# Supplementary material
Source: PubMed Central journal article supplement (PMC4205642)
Supplement: pnas.201407447SI.pdf [file pnas.201407447SI.pdf]

# Supporting Information

Wang et al. 10.1073/pnas.1407447111

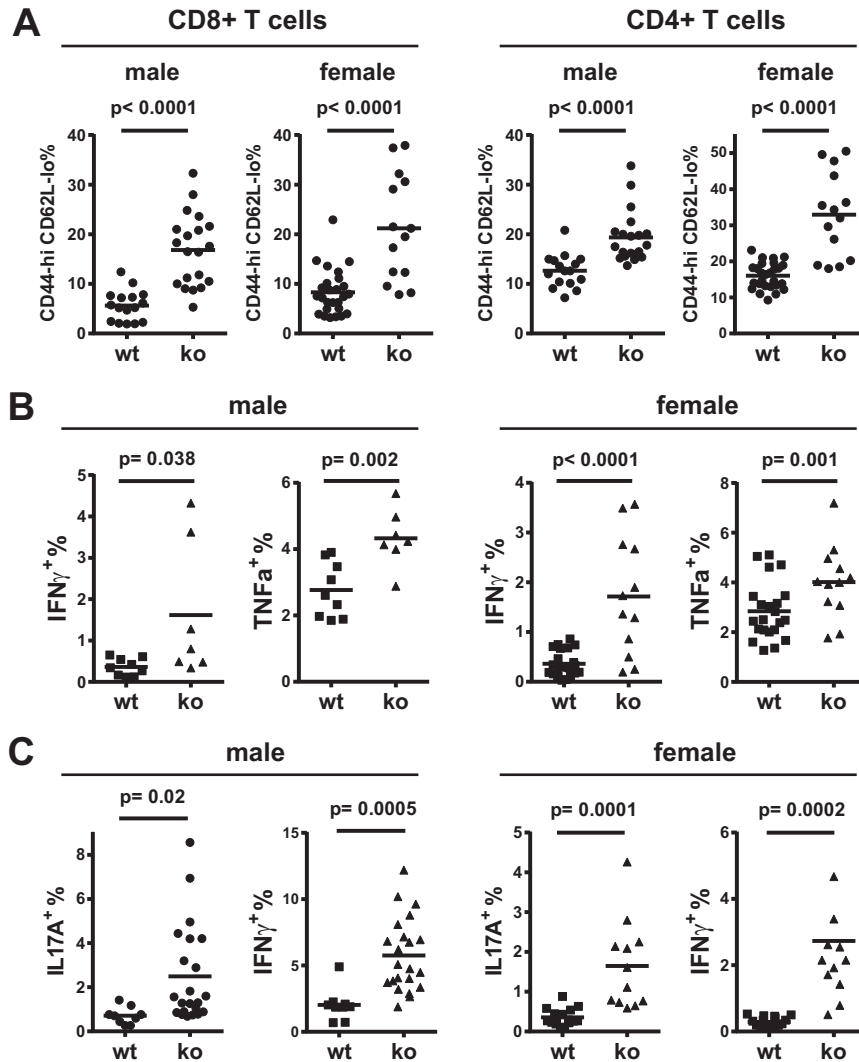

**Fig. S1.** Accumulation of spontaneously activated T cells in the peripheral blood of V domain-containing Ig suppressor of T-cell activation knockout (VISTA<sup>ko</sup>) mice. Whole blood was collected from 8- to 9-mo-old age- and sex-matched WT and VISTA<sup>ko</sup> mice and analyzed by flow cytometry. The percentages of T cells with activated phenotype (CD44<sup>hi</sup> CD62L<sup>lo</sup>) were quantified and are shown (A). Cells were stimulated ex vivo overnight with soluble anti-CD3/CD28, and T-cell cytokine production (i.e., IFN- $\gamma$ , TNF- $\alpha$ , and IL-17A) was examined and is shown (B, CD8<sup>+</sup> T cells; C, CD4<sup>+</sup> T cells). Shown are representative results of at least three independent experiments.

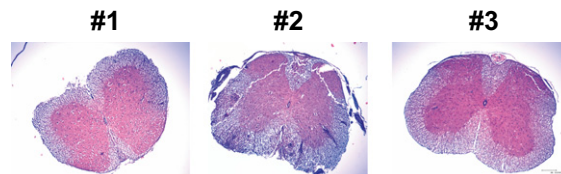

**Fig. S2.** Demyelination of the CNS from diseased VISTA<sup>ko</sup> 2D2 mice. Spinal cord sections from three diseased VISTA<sup>ko</sup> 2D2 mice (score between 2.5 and 3) were stained with hematoxylin and eosin/Luxol fast blue. (Scale bar: 36  $\mu$ m.) Representative images are shown.
